# Supplementary material for: On the role of functional groups in the formation of diazonium based covalent attachments: dendritic vs. layer-by-layer growth
Source: Royal Society of Chemistry journal article supplement (doi:10.1039/d3ra02661b), 2023-01-01
Supplement: d3ra02661b1.pdf [file d3ra02661b1.pdf]

## SUPPORTING INFORMATION

### **ON THE ROLE OF FUNCTIONAL GROUPS IN THE FORMATION OF DIAZONIUM BASED COVALENT ATTACHMENT: DENDRITIC VS LAYER-BY-LAYER GROWTH**

Thi Mien Trung Huynh<sup>1\*</sup>, Kazukuni Tahara<sup>2</sup>, Steven De Feyter<sup>3</sup> and Thanh Hai Phan<sup>\*4</sup>

<sup>1</sup>Department of Chemistry, Faculty of Natural Sciences, Quynhon University, 170 An Duong  
Vuong, Quy Nhon, Vietnam

<sup>2</sup> Department of Applied Chemistry, School of Science and Technology, Meiji University, 1-1-1  
Higashimita, Tamaku, Kawasaki, Kanagawa 214-8571, Japan

<sup>3</sup> Division of Molecular Imaging and Photonics, Department of Chemistry, KU Leuven,  
Celestijnenlaan 200F, Leuven B-3001, Belgium

<sup>4</sup>Department of Physics and Materials Science, Faculty of Natural Sciences, Quy Nhon  
University, 170 An Duong Vuong, Quy Nhon, Vietnam

**Figure S1:** Thickness measurement of (a) 4-NBD and (b) 4-CBD grafted layers: To determine the film thickness, we have used a previously reported protocol [1]. In a small area, we cleaned the surface by using the AFM tip, at high force, as a “broom”, i.e. a process referred to as nanoshaving. Such approach effectively removes physisorbed as well as grafted molecules from the substrate, thereby regenerating pristine graphite in that area. By measuring a topography profile at the border between a grafted area and cleaned area, by using AFM at low force, we can estimate the film thickness.

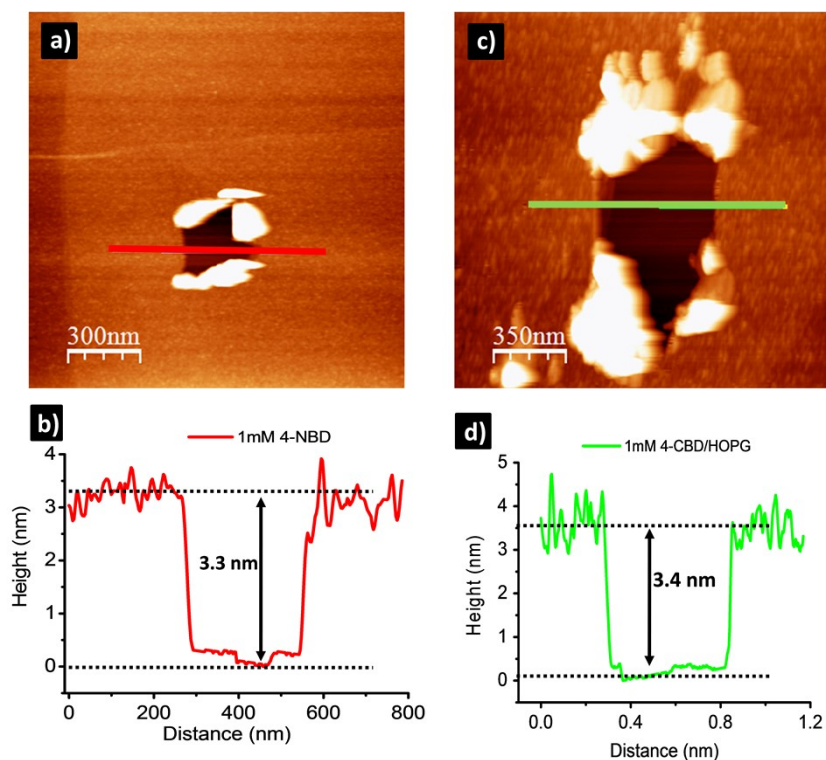

**Figure S2:** Formation of the disk-like features on the grafted layer of 4-CBD

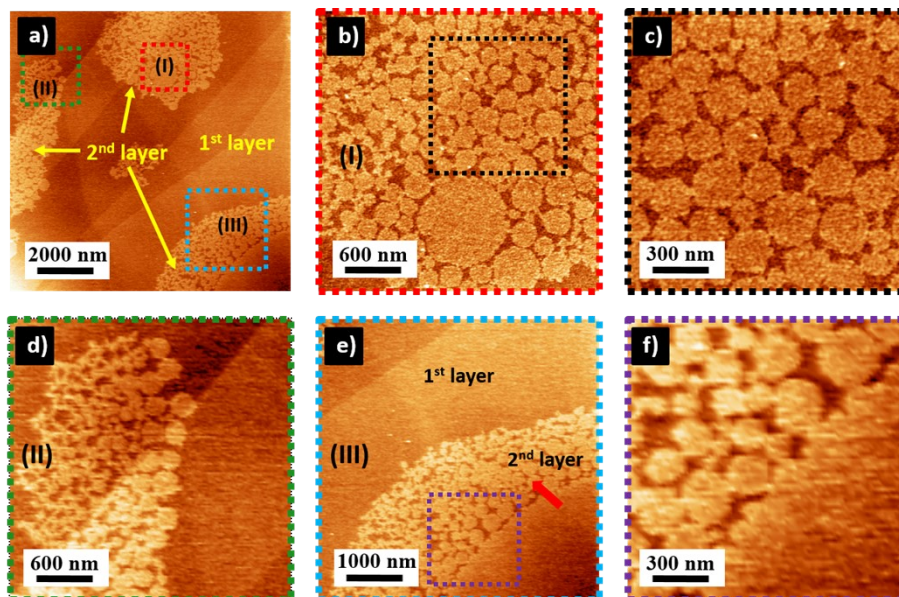

All DFT simulations were performed under vacuum using the Gaussian 16W version 1.1 (Gaussian, Inc.) program [2]. The geometry optimizations were performed by DFT calculations at the M06-2X/6-311+G(3df, 2p) level of theory. No imaginary frequency was confirmed for all compounds. The HOMO and LUMO energy levels of the aryl diazonium cations are summarized in Table S1. The SOMO- $\alpha$  energy levels of the corresponding aryl radicals are summarized in Table S2.

**Table S1.** The HOMO and LUMO energy levels of the aryldiazonium cations.

| aryldiazonium cation | HOMO level (eV) | LUMO level (eV) |
|----------------------|-----------------|-----------------|
| 4-CBD                | -13.87          | -7.17           |
| 4-NBD                | -14.33          | -7.60           |

**Table S2.** The SOMO- $\alpha$  energy levels of the aryl radicals.

| aryl radical            | SOMO- $\alpha$ level (eV) |
|-------------------------|---------------------------|
| 4-carboxyphenyl radical | -8.70                     |
| 4-nitrophenyl radical   | -9.18                     |

In the following images, molecular orbital distributions are shown at an isovalue of 0.02 and spin densities are shown at an isovalue of 0.01.

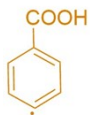

Orientation of carboxy group: parallel to the ring.

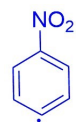

Orientation of nitro group: parallel to the ring.

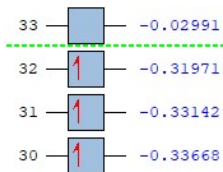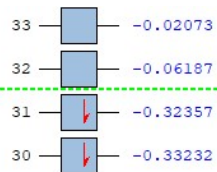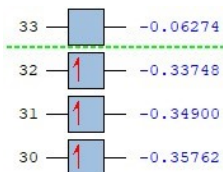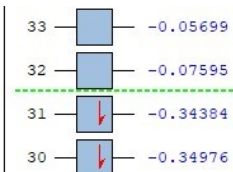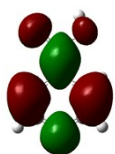

alpha (LUMO)

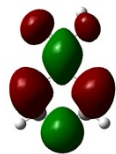

beta (LUMO)

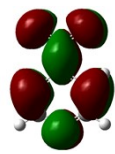

alpha (LUMO)

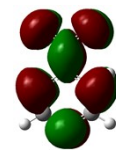

beta (LUMO)

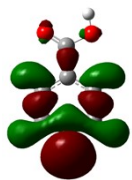

alpha (SOMO)

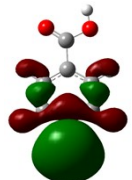

beta (SOMO)

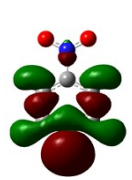

alpha (SOMO)

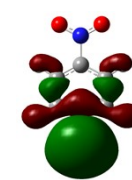

beta (SOMO)

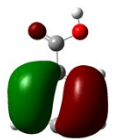

alpha (SOMO-1)

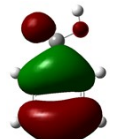

beta (SOMO-1)

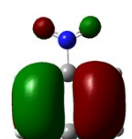

alpha (SOMO-1)

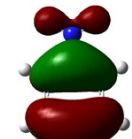

beta (SOMO-1)

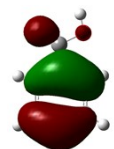

alpha (SOMO-2)

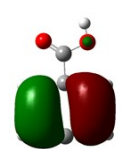

beta (SOMO-2)

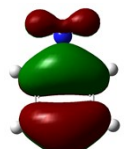

alpha (SOMO-2)

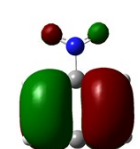

beta (SOMO-2)

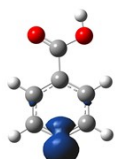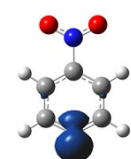

spin density

spin density

## Reference

[1] Steeno, R., Van Gorp, H., Walke, P., Mali, K. S. & De Feyter, S. *AFM nanoshaving of covalently modified graphite for studying molecular self-assembly under lateral nanoconfinement*. *J. Phys. Chem. C*. 2021, 125, 21624–21634.

[2] Frisch, M. J.; Trucks, G. W.; Schlegel, H. B.; Scuseria, G. E.; Robb, M. A.; Cheeseman, J. R.; Scalmani, G.; Barone, V.; Petersson, G. A.; Nakatsuji, H.; Li, X.; Caricato, M.; Marenich, A. V.; Bloino, J.; Janesko, B. G.; Gomperts, R.; Mennucci, B.; Hratchian, H. P.; Ortiz, J. V.; Izmaylov, A. F.; Sonnenberg, J. L.; Williams-Young, D.; Ding, F.; Lipparini, F.; Egidi, F.; Goings, J.; Peng, B.; Petrone, A.; Henderson, T.; Ranasinghe, D.; Zakrzewski, V. G.; Gao, J.; Rega, N.; Zheng, G.; Liang, W.; Hada, M.; Ehara, M.; Toyota, K.; Fukuda, R.; Hasegawa, J.; Ishida, M.; Nakajima, T.; Honda, Y.; Kitao, O.; Nakai, H.; Vreven, T.; Throssell, K.; Montgomery, J. A., Jr.; Peralta, J. E.; Ogliaro, F.; Bearpark, M. J.; Heyd, J. J.; Brothers, E. N.; Kudin, K. N.; Staroverov, V. N.; Keith, T. A.; Kobayashi, R.; Normand, J.; Raghavachari, K.; Rendell, A. P.; Burant, J. C.; Iyengar, S. S.; Tomasi, J.; Cossi, M.; Millam, J. M.; Klene, M.; Adamo, C.; Cammi, R.; Ochterski, J. W.; Martin, R. L.; Morokuma, K.; Farkas, O.; Foresman, J. B.; Fox, D. J. *Gaussian 16*, Revision A.03, Gaussian, Inc., Wallingford CT, 2016.
